# Supplementary material for: Simulated Microgravity Effects on Human Adenocarcinoma Alveolar Epithelial Cells: Characterization of Morphological, Functional, and Epigenetic Parameters
Source: MDPI journal article supplement (doi:10.3390/ijms22136951), 2021-06-28
Supplement: s1 [file s1]

Suppl. Table S1. Down- and Up-regulated microRNA (selected >2-fold variation and P < 0.05) after microarray of A549 cells analysis of NG/MG pairs.

## **DOWN**

hsa-miR-1234-3p  
hsa-miR-1260a  
hsa-miR-151a-5p  
hsa-miR-151b  
hsa-miR-16-5p  
hsa-miR-181a-5p  
hsa-miR-18a-5p  
hsa-miR-194-5p  
hsa-miR-20a-5p  
hsa-miR-221-3p  
hsa-miR-22-3p  
hsa-miR-30c-5p  
hsa-miR-3162-5p  
hsa-miR-34a-5p  
hsa-miR-3651  
hsa-miR-374a-5p  
hsa-miR-4281  
hsa-miR-4516  
hsa-miR-4530  
hsa-miR-4687-3p  
hsa-miR-5787  
hsa-miR-6089  
hsa-miR-6090  
hsa-miR-6124  
hsa-miR-7641  
hsa-miR-940

## **UP**

hsa-let-7b-5p  
hsa-let-7d-5p  
hsa-miR-107  
hsa-miR-10a-5p  
hsa-miR-1202  
hsa-miR-1207-5p  
hsa-miR-125a-5p  
hsa-miR-193b-3p  
hsa-miR-215-5p  
hsa-miR-26a-5p  
hsa-miR-29a-3p  
hsa-miR-3195  
hsa-miR-3198  
hsa-miR-320a  
hsa-miR-320d  
hsa-miR-365a-3p  
hsa-miR-3960  
hsa-miR-425-5p  
hsa-miR-4485-3p  
hsa-miR-4505  
hsa-miR-4507  
hsa-miR-4665-3p  
hsa-miR-4672  
hsa-miR-6088  
hsa-miR-6734-5p  
hsa-miR-6749-5p  
hsa-miR-6800-5p  
hsa-miR-6821-5p  
hsa-miR-6869-5p  
hsa-miR-7107-5p  
hsa-miR-8069  
hsa-miR-96-5p
